# Supplementary material
Source: HighWire-hosted journal article supplement (https://www.annfammed.org/highwire/filestream/8229/field_highwire_adjunct_files/0/Henry_Supp_App.pdf)
Supplement: Henry_Supp_App.pdf [file Henry_Supp_App.pdf]

**Online Supplementary Material**

Henry SG, Fetters MD. Video elicitation interviews: a qualitative method for investigating physician-patient interactions. *Ann Fam Med*. 2012;10(2):118-125.

<http://www.annfammed.org/content/10/2/118/suppl/DC1>

**Supplemental Appendix. Physician interview guide used during video elicitation interviews.**

**PHYSICIAN PARTICIPANT No.**\_\_

**Date:** \_\_\_/\_\_\_/\_\_\_

**Interviewer:** \_\_\_\_\_

**Location:** \_\_\_\_\_

Reminder to the interviewer. Please be sure to ask each question. This can be done during viewing of the encounter, or at the end of the viewing debriefing.

Special circumstances of interview:

**INTRODUCTION:** In our research, we are interested in learning how doctors and patients make decisions about what preventive services the patient should get during a general physical. As you watch the video of your recent patient encounter with Ms. Smith, I would like for you to think about the strategies you use and decisions you make when deciding which preventive services you plan on providing during the visit. You may want to comment on how you prioritize preventive services relative to other competing demands, such as prescription refills, requests for care for other family members, or other non-prevention activities. Also, I would like for you to comment on what you think is appropriate consent for preventive services in generalist practice, and how, if at all, you think it needs to be different for different kinds of preventive services.

1. When you first found out you were going to be doing a general physical on Ms. Smith, what preventive services were you planning on covering with her? What things did you consider when formulating your preventive services agenda for Ms. Smith's visit?
2. What factors influenced you to address the particular services you did for Ms. Smith?
3. In what ways was your encounter with Ms. Smith, today, a typical health check-up for you?
4. In what ways was your encounter with Ms. Smith, today, **NOT** a typical health check-up?
5. What different roles do you experience your patients taking in decision making about preventive health services?
6. Do you think Ms. Smith will follow-up on recommendations that you made during her visit?
7. How do you prioritize your health promotion and disease prevention communications?
8. How do you balance time pressures, and patient discussions about prevention?
9. Different groups have different ideas about what constitutes a high quality preventive services visit. Think about your own clinical practice and describe in what ways the visit with Ms. Smith demonstrates your efforts to provide "high quality" preventive services.
10. From your perspective as a generalist physician, what items or standards should be used for assessing the quality of delivery of preventive services in generalist practice?
11. How do you handle circumstances when a new preventive service is added to the list of preventive services you are supposed to do? Can you think of anything you have added or changed recently?

### Online Supplementary Data

<http://www.annfammed.org/content/10/2/118/suppl/DC1>

12. Are there any preventive services that you routinely avoid or intentionally avoid during the HME? What are the reasons for this? Are some things easier to integrate into caring for specific problems?
13. Are there any preventive services that you prefer to provide during other kinds of visits?
14. How did having the video camera in the room affect you?
15. How did reviewing the videotape of your interaction with the patient and this interview about the visit affect you?
16. Can you think of anything else regarding communication with patients about preventive health services?
